# Supplementary material for: Low-Cost Perovskite Solar Cell Fabricated using the Expanded Graphite Back Contact and Electronically Conducting Activated Carbon as the Hole Transporting Material
Source: PubMed Central journal article supplement — ACS Omega. 2023 Jun 20;8(26):23501–9. doi: 10.1021/acsomega.3c00637 (PMC10323940; doi:10.1021/acsomega.3c00637), 2023-06-20
Supplement: ao3c00637_si_001.pdf [file ao3c00637_si_001.pdf]

## Supporting Information

Low-cost perovskite solar cell fabricated using expanded graphite back contact and electronically conducting activated carbon as hole transporting material

*Buddhika C Karunaratne<sup>[a,b]</sup>, Shashiprabha P Dunuweera<sup>[b,c]</sup>, Asiri T Medagedara<sup>[a,b]</sup>,*

*Dhayalan Velauthapillai <sup>[d]</sup>, Ravirajan Punniamoorthy <sup>[e]</sup>, A.G. Unil Perera<sup>[f]</sup>, L. Ajith*

*DeSilva <sup>[g]</sup>, Kirthi Tennakone <sup>[f,a]</sup> and Rajapakse Mudiyanseelage Gamini Rajapakse <sup>[b,c]</sup>,*

*Gamaralalage Rajanya Asoka Kumara<sup>[a]</sup>*

<sup>[a]</sup>National Institute of Fundamental Studies, 20000, Sri Lanka

<sup>[b]</sup>Postgraduate Institute of Science, University of Peradeniya, Peradeniya, Sri Lanka.

<sup>[c]</sup>Department of Chemistry, University of Peradeniya, Peradeniya, Sri Lanka

<sup>[d]</sup>Faculty of Engineering and Science, Western Norway University of Applied Sciences,  
5063, Bergen, Norway.

<sup>[e]</sup>Department of Physics, University of Jaffna, Jaffna, 40000, Sri Lanka.

<sup>[f]</sup>Department of Physics, Georgia State University, Georgia, USA

<sup>[g]</sup>Department of Physics, University of West Georgia, Georgia, USA.

Number of Pages: 4

Number of Tables: 7

## 1. Cost analysis of synthesis of active carbon

Since coconut shells is a waste material in Sri Lanka, we obtained them without any cost. Carbonization was done by simply burning the coconut shells in a covered pot without using electricity.

### 1.1 Cost of disc milling coconut charcoal

| Parameter                                       | Value  | unit                |
|-------------------------------------------------|--------|---------------------|
| Capacity of the disc mill                       | 5      | g                   |
| Power consumption of the disc mill              | 0.75   | kW                  |
| Time taken to disc mill charcoal                | 300    | s                   |
| Energy required to disc mill charcoal ( $Q_1$ ) | 0.0125 | kWh g <sup>-1</sup> |

### 1.2 Cost of activating charcoal

#### 1.2.1 Cost of heating the charcoal

| Parameter                                                      | Value | Unit                |
|----------------------------------------------------------------|-------|---------------------|
| Capacity of the furnace                                        | 10    | g                   |
| Heating temperature                                            | 950   | °C                  |
| Power consumption of the furnace                               | 1.0   | kW                  |
| Time taken to heat the furnace from room temperature to 950 °C | 1500  | s                   |
| Time kept charcoal at 950 °C                                   | 1200  | s                   |
| Total energy required ( $Q_2$ )                                | 0.075 | kWh g <sup>-1</sup> |

#### 1.2.2 Cost of quenching charcoal in distilled water to make activated coconut shell charcoal

| Parameter | Value | Unit |
|-----------|-------|------|
|-----------|-------|------|

|                                                                  |      |                     |
|------------------------------------------------------------------|------|---------------------|
| Amount of distilled water required to quench the charcoal        | 250  | mL g <sup>-1</sup>  |
| Cost of distilled water                                          | 0.75 | kWh L <sup>-1</sup> |
| Cost of Distilled water for quenching charcoal (Q <sub>3</sub> ) | 0.19 | kWh g <sup>-1</sup> |

### 1.2.3 Cost for drying active charcoal

| Parameter                                                         | Value | Unit                |
|-------------------------------------------------------------------|-------|---------------------|
| Capacity of hotplate                                              | 10    | g                   |
| Drying temperature                                                | 100   | °C                  |
| Drying time                                                       | 12    | hours               |
| Power consumption of the hot plate                                | 0.16  | kW                  |
| Energy for drying active coconut shell charcoal (Q <sub>4</sub> ) | 0.192 | kWh g <sup>-1</sup> |

Energy required to synthesis activated coconut shell charcoal (Q<sub>C</sub>),

$$Q_C = Q_1 + Q_2 + Q_3 + Q_4 \quad (S1)$$

$$Q_C = 0.470 \text{ kWh g}^{-1}$$

Electricity cost of Sri Lanka is 0.04 USD kWh<sup>-1</sup>. Hence, the cost to synthesis activated coconut shell charcoal is around 0.02 USD g<sup>-1</sup>

### 1.3 Price comparison of CSAC and Spiro-OMeTAD

| Material     | Price (USD g <sup>-1</sup> ) |
|--------------|------------------------------|
| CSAC         | 0.02                         |
| Spiro-OMeTAD | 660 <sup>2</sup>             |

## 2. Cost analysis of synthesis of expanded graphite form graphite

Since we used discarded graphite attached rocks, it did not cost us any money to obtained raw expanded graphite

### 2.1 Acid and heat treatment to synthesis intercalated graphite

| Parameter                                                       | Value              | Units                |
|-----------------------------------------------------------------|--------------------|----------------------|
| Conc. H <sub>2</sub> SO <sub>4</sub> amount required            | 24                 | mL g <sup>-1</sup>   |
| Price of conc. H <sub>2</sub> SO <sub>4</sub> (P <sub>1</sub> ) | 0.008 <sup>3</sup> | USD mL <sup>-1</sup> |
| Conc. HNO <sub>3</sub> amount required                          | 4                  | mL g <sup>-1</sup>   |
| Price of conc. HNO <sub>3</sub> (P <sub>2</sub> )               | 0.06 <sup>4</sup>  | USD mL <sup>-1</sup> |
| Capacity of furnace                                             | 5                  | g                    |

|                                                                 |       |                     |
|-----------------------------------------------------------------|-------|---------------------|
| Heating temperature                                             | 600   | °C                  |
| Time taken to heat to 600 °C from room temperature              | 600   | s                   |
| Time kept at 600 C                                              | 600   | s                   |
| Power consumption of the furnace                                | 0.65  | kW                  |
| Energy required to synthesis expanded graphite(Q <sub>5</sub> ) | 0.043 | kWh g <sup>-1</sup> |

Cost to synthesis expanded graphite (Q<sub>EG</sub>),

$$Q_{EG} = 24P_1 + 4P_2 + 0.04Q_5 \quad (S2)$$

$$Q_{EG} = 0.43 \text{ USD g}^{-1}$$

## 2.2 Price comparison of expanded graphite and gold

| Material          | Price (USD g <sup>-1</sup> ) |
|-------------------|------------------------------|
| Expanded graphite | 0.43                         |
| Gold              | 132.5 <sup>5</sup>           |

## References

- (1) Sri Lanka electricity prices, June 2022 | GlobalPetrolPrices.com [https://www.globalpetrolprices.com/Sri-Lanka/electricity\\_prices/](https://www.globalpetrolprices.com/Sri-Lanka/electricity_prices/) (accessed Mar 9, 2023).
- (2) Spiro-OMeTAD - Solaronix Online Shop <https://shop.solaronix.com/spiro-ometad.html> (accessed Mar 9, 2023).
- (3) Downloads | Research Lab Fine Chem Industries [https://researchlab.in/downloads/#chemical\\_product\\_list](https://researchlab.in/downloads/#chemical_product_list) (accessed Mar 13, 2023).
- (4) Nitric acid puriss. p.a., reag. ISO, reag. Ph. Eur., for determinations with dithizone, = 65 7697-37-2 <https://www.sigmaaldrich.com/LK/en/product/sigald/30709> (accessed Mar 9, 2023).
- (5) Wire - Vacuum Evaporation Deposition Wire and Materials [https://www.tedpella.com/vacuum\\_html/Materials\\_and\\_Wires\\_for\\_Vacuum\\_Evaporati on\\_Deposition.aspx](https://www.tedpella.com/vacuum_html/Materials_and_Wires_for_Vacuum_Evaporati on_Deposition.aspx) (accessed Mar 9, 2023).
